# Supplementary material
Source: Springer Nature journal article supplement (https://www.springermedizin.de/resource/supplementary/12936_2007_371_MOESM1_ESM.pdf/9547660)
Supplement: MOESM1 [file 9547660]

### Detergent extraction

**A**

| Lane | 1 | 2 | 3 | 4 | 5 | 6 | 7 | 8 |
|------|---|---|---|---|---|---|---|---|
| I/U  | U | U | I | I | U | U | I | I |
| Tryp | - | + | - | + | - | + | - | + |

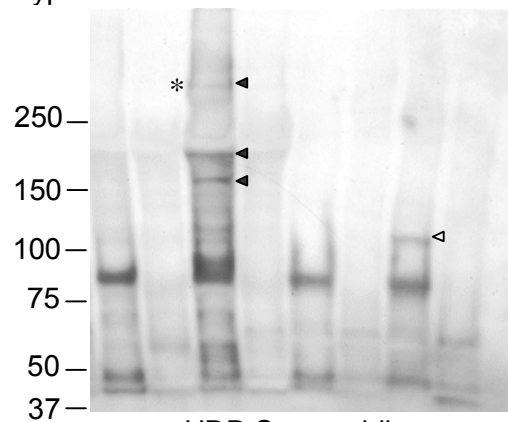

HRP-Streptavidin

### Osmotic lysis

**B**

| Lane | 1 | 2 | 3 | 4 | 5 | 6 | 7 | 8 | 9 | 10 |
|------|---|---|---|---|---|---|---|---|---|----|
| I/U  | I | I | U | U | I | I | U | U | I | I  |
| Tryp | - | + | - | + | - | + | - | + | - | +  |

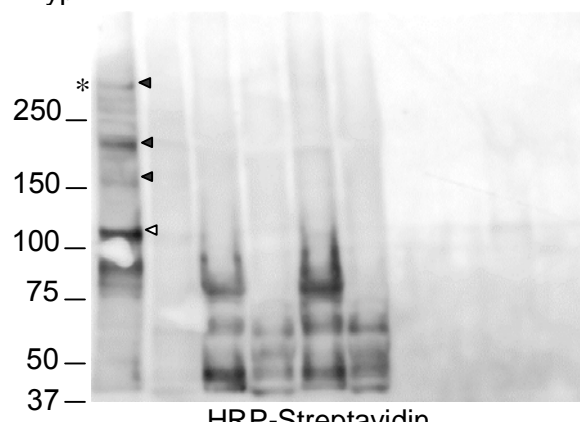

HRP-Streptavidin

**C**

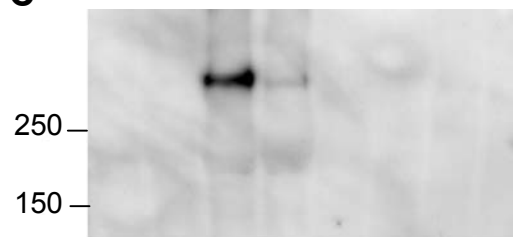

Anti-PfEMP1 (ATS)

**D**

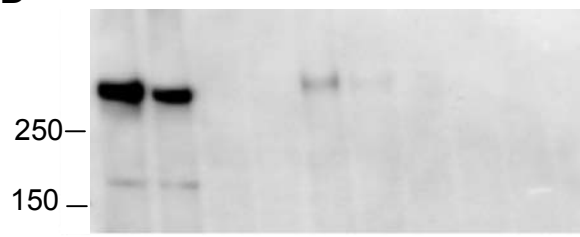

Anti-PfEMP1 (ATS)

**E**

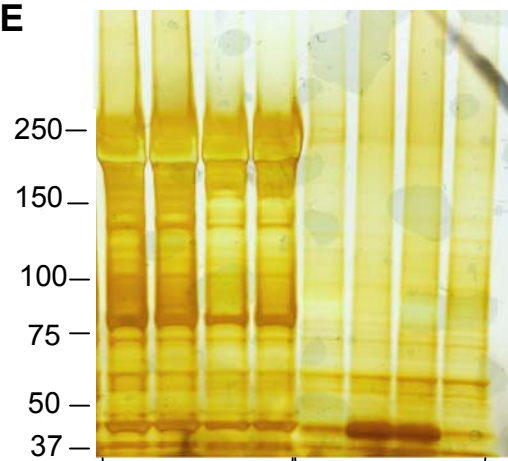

Ti

Ts

Silver stain

**F**

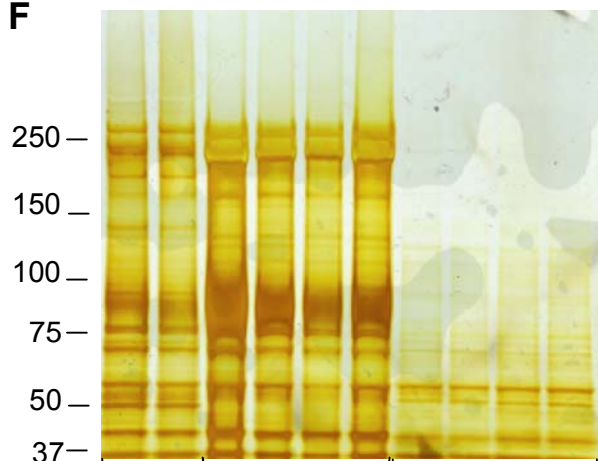

Op

Om

Os

Silver stain
